# Supplementary material
Source: publisher figshare collection journal article supplement (https://tandf.figshare.com/articles/dataset/_/3172909)
Supplement: Supplementary file 2 [file tams_a_1159984_sm5071.pdf › tams_a_1159984_sm5071.pdf]

ME Alexander, CA Simon, CL Griffiths, K Peters, S Sibanda, S Miza, B Groenewald, P Majiedt, KJ Sink and TB Robinson

## Short Communication

### Back to the future: reflections and directions of South African marine bioinvasion research

*African Journal of Marine Science*, 2016. 4 pp. DOI: 10.2989/1814232X.2016.1159984.

**Supplementary Appendix S1:** Publications used in literature review. Reproduced from Supplementary Appendix S1 in companion paper: Robinson TB, Alexander ME, Simon CA, Griffiths CL, Peters K, Sibanda S et al. (2016). *African Journal of Marine Science*. DOI: 10.2989/1814232X.2016.1163292.

Bolton JJ, Andreakis N, Anderson RJ. 2011. Molecular evidence for three separate cryptic introductions of the red seaweed *Asparagopsis* (Bonnemaisoniales, Rhodophyta) in South Africa. *African Journal of Marine Science* 33: 263–271.

Bownes SJ, Barker NP, McQuaid CD. 2008. Morphological identification of primary settlers and post-larvae of three mussel species from the coast of South Africa. *African Journal of Marine Science* 30: 233–240.

Bownes SJ, McQuaid CD. 2006. Will the invasive mussel *Mytilus galloprovincialis* Lamarck replace the indigenous *Perna perna* L. on the south coast of South Africa? *Journal of Experimental Marine Biology and Ecology* 338: 140–151.

Bownes SJ, McQuaid CD. 2009. Mechanisms of habitat segregation between an invasive and an indigenous mussel: settlement, post-settlement mortality and recruitment. *Marine Biology* 156: 991–1006.

Bownes SJ, McQuaid CD. 2010. Mechanisms of habitat segregation between an invasive (*Mytilus galloprovincialis*) and an indigenous (*Perna perna*) mussel: adult growth and mortality. *Marine Biology* 157: 1799–1810.

Branch GM, Odendaal F, Robinson TB. 2008. Long-term monitoring of the arrival, expansion and effects of the alien mussel *Mytilus galloprovincialis* relative to wave action. *Marine Ecology Progress Series* 370: 171–183.

Branch GM, Odendaal F, Robinson TB. 2010. Competition and facilitation between the alien mussel *Mytilus galloprovincialis* and indigenous species: moderation by wave action. *Journal of Experimental Marine Biology and Ecology* 383: 65–78.

Branch GM, Steffani CN. 2004. Can we predict the effects of alien species? A case-history of the invasion of South Africa by *Mytilus galloprovincialis* (Lamarck). *Journal of Experimental Marine Biology and Ecology* 300: 189–215.

Calvo-Ugarteburu G, McQuaid CD. 1998. Parasitism and introduced species: epidemiology of trematodes in the intertidal mussels *Perna perna* and *Mytilus galloprovincialis*. *Journal of Experimental Marine Biology and Ecology* 220: 47–65.

Calvo-Ugarteburu G, McQuaid CD. 1998. Parasitism and invasive species: effects of digenetic trematodes on mussels. *Marine Ecology Progress Series* 169: 149–163.

Clark BM, Griffiths CL. 2012. Western pea crabs *Pinnixa occidentalis* Rathbun 1894 (Brachyura: Thoracotremata: Pinnotheroidea) invade Saldanha Bay, South Africa. *African Journal of Marine Science* 34: 153–156.

Coleman RA, Hockey PAR. 2008. Effects of an alien invertebrate species and wave action on prey selection by African black oystercatchers. *Austral Ecology* 33: 232–240.

David AA, Simon CA. 2014 The effect of temperature on larval development of two non-indigenous poecilogonous polychaetes (Annelida: Spionidae) with implications for life history theory, establishment and spread. *Journal of Experimental Marine Biology and Ecology* 46: 20–30.

De Clerck O, Anderson RJ, Bolton JJ, Robertson-Anderson D. 2002. *Schimmelmannia elegans* (Gloiosiphoniaceae, Rhodophyta): South Africa's first introduced seaweed? *Phycologia* 41: 184–190.

de Greef K, Griffiths CL, Zeeman Z. 2013. Déjà vu? A second mytilid mussel, *Semimytilus algosus*, invades South Africa's west coast. *African Journal of Marine Science* 35: 307–313.

Erlandsson J, McQuaid CD, Skold M. 2011. Patchiness and co-existence of indigenous and invasive mussels at small spatial scales: the interaction of facilitation and competition. *PLoS ONE* 6: e26958.

Erlandsson J, Pal P, McQuaid CD. 2006. Re-colonisation rate differs between co-existing indigenous and invasive intertidal mussels following major disturbance. *Marine Ecology Progress Series* 320: 169–176.

Griffiths CL, Hockey PAR, Van Erkom Schurink C, Le Roux PJ. 1992. Marine invasive aliens on South African shores: implications for community structure and trophic functioning. *South African Journal of Marine Science* 12: 713–722.

Griffiths CL, Mead A, Robinson T. 2009. A brief history of marine bio-invasions in South Africa. *African Zoology* 44: 241–247.

- Griffiths CL, Robinson TB, Lange L, Mead A. 2010. Marine biodiversity in South Africa: an evaluation of current states of knowledge. *PLoS ONE* 5(8): e12008.
- Hampton SL, Griffiths CL. 2007. Why *Carcinus maenas* cannot get a grip on South Africa's wave-exposed coastline. *African Journal of Marine Science* 29: 123–126.
- Hanekom N. 2008. Invasion of an indigenous *Perna perna* mussel bed on the south coast of South Africa by an alien mussel *Mytilus galloprovincialis* and its effect on the associated fauna. *Biological Invasions* 10: 233–244.
- Hanekom N. 2011. Trophic structure and biomass distribution of macrobenthos on sheltered and semi-exposed rocky shores of Tsitsikamma Marine Protected Area. *African Zoology* 46: 224–238.
- Haupt TM, Griffiths CL, Robinson TB. 2012. Intra-regional translocations of epifaunal and infaunal species associated with cultured Pacific oysters *Crassostrea gigas*. *African Journal of Marine Science* 34: 187–194.
- Haupt TM, Griffiths CL, Robinson TB, Tonin AFG. 2010. Oysters as vectors of marine aliens, with notes on four introduced species associated with oyster farming in South Africa. *African Zoology* 45: 52–62.
- Heasman KG, Pitcher GC, McQuaid CD, Hecht T. 1998. Shellfish mariculture in the Benguela system – raft culture of *Mytilus galloprovincialis* and the effect of rope spacing on food extraction, growth rate, reproduction and condition of mussels. *Journal of Shellfish Research* 17: 33–39.
- Hiller N. 1994. The environment, biogeography and origin of the Southern African recent brachiopod fauna. *Journal of Paleontology* 68: 776–786.
- Jungerstam J, Erlandsson J, McQuaid CD, Porri F, Westerbom M, Kraufvelin P. 2014. Is habitat amount important for biodiversity in rocky shore systems? A study of South African mussel assemblages. *Marine Biology* 161: 1507–1519.
- Laird MC, Griffiths CL. 2008. Present distribution and abundance of the introduced barnacle *Balanus glandula* Darwin in South Africa. *African Journal of Marine Science* 30: 93–100.
- Le Roux PJ, Branch GM, Joska MAP. 1990. On the distribution, diet and possible impact of the invasive European shore crab *Carcinus maenas* (L.) along the South African coast. *South African Journal of Marine Science* 9: 85–93.
- Lee JE, Chown SL. 2007. *Mytilus* on the move: transport of an invasive bivalve to the Antarctic. *Marine Ecology Progress Series* 339: 307–310.
- Lee JE, Chown SL. 2009. Temporal development of hull-fouling assemblages associated with an Antarctic supply vessel. *Marine Ecology Progress Series* 386: 97–105.
- Malherbe H, Samways M. 2014. Rocky shores of a major southern African Marine Protected Area are almost free from intertidal invertebrate alien species. *Koedoe* 56: Art. #1206.
- Marquet N, Nicastro KR, Gektidis M, McQuaid CD, Pearson GA, Serrao EA, Zardi GI. 2013. Comparison of phototrophic shell-degrading endoliths in invasive and native populations of the intertidal mussel *Mytilus galloprovincialis*. *Biological Invasions* 15: 1253–1272.
- McQuaid CD, Philips TE. 2000. Limited wind-driven dispersal of intertidal mussel larvae: in situ evidence from the plankton and the spread of the invasive species *Mytilus galloprovincialis* in South Africa. *Marine Ecology Progress Series* 201: 211–220.
- McQuaid KA, Griffiths CL. 2014. Alien reef-building polychaete drives long-term changes in invertebrate biomass and diversity in a small, urban estuary. *Estuarine, Coastal and Shelf Science* 138: 101–106.
- Mead A, Carlton JT, Griffiths CL, Rius M. 2011. Revealing the scale of marine bioinvasions in developing regions: a South African re-assessment. *Biological Invasions* 13: 1991–2008.
- Mead A, Carlton JT, Griffiths CL, Rius M. 2011. Introduced and cryptogenic marine and estuarine species of South Africa. *Journal of Natural History* 45: 2463–2524.
- Mead A, Griffiths CL, Branch GM, McQuaid CD, Blamey LK, Bolton JJ, Anderson RJ, Dufois F, Rouault M, Froneman PW, Whitfield AK, Harris LR, Nel R, Pillay D, Adams JB. 2013. Human-mediated drivers of change – impacts on coastal ecosystems and marine biota of South Africa. *African Journal of Marine Science* 35: 403–425.
- Miranda NAF, Perissinotto R, Appleton CC. 2010. Salinity and temperature tolerance of the invasive freshwater gastropod *Terebia granifera*. *South African Journal of Science* 106: Art#156, 7 pages. doi: 10.4102/sajs.v106i3/4.156.
- Miranda NAF, Perissinotto R, Appleton CC. 2011. Population structure of an invasive parthenogenic gastropod in coastal lakes and estuaries of northern KwaZulu-Natal, South Africa. *PLoS One* doi: 10.1371/journal.pone.0024337.
- Miranda NAF, Perissinotto R, Appleton CC. 2011. Feeding dynamics of the invasive gastropod *Terebia granifera* in coastal and estuarine lakes of northern KwaZulu-Natal, South Africa. *Estuarine, Coastal and Shelf Science* 91: 442–449 doi: 10.1016/j.ecss.2010.11.007.

- Nicastro KR, Zardi GI, McQuaid CD. 2007. Behavioural response of invasive *Mytilus galloprovincialis* and indigenous *Perna perna* mussels exposed to risk of predation. *Marine Ecology Progress Series* 336: 169–175.
- Nicastro KR, Zardi GI, McQuaid CD. 2008. Movement behaviour and mortality in invasive and indigenous mussels: resilience and resistance strategies at different spatial scales. *Marine Ecology Progress Series* 372: 119–126.
- Nicastro KR, Zardi GI, McQuaid CD. 2010. Differential reproductive investment, attachment strength and mortality of invasive and indigenous mussels across heterogeneous environments. *Biological Invasions* 12: 2165–2177.
- Nicastro KR, Zardi GI, McQuaid CD, Pearson GA, Serrao EA. 2012. Love thy neighbour: group properties of gaping behaviour in mussel aggregations. *PLoS ONE* 7: e47382.
- Nicastro KR, Zardi GI, McQuaid CD, Stephens L, Radloff S, Blatch GL. 2010. The role of gaping behaviour in habitat partitioning between coexisting intertidal mussels. *BMC Ecology* 10: 17.
- Ordonez V, Rius M, McQuaid CD, Pineda MC, Pascual M, Turon X. 2013. Early biotic interactions among introduced and native benthic species reveal cryptic predation and shifts in larval behaviour. *Marine Ecology Progress Series* 488: 65–79.
- Peters K, Griffiths CL, Robinson TB. 2014. Patterns and drivers of marine bioinvasions in eight Western Cape harbours, South Africa. *African Journal of Marine Science* 36: 49–57.
- Pfaff MC, Branch GM, Wieters EA, Branch RA, Broitman BR. 2011. Upwelling intensity and wave exposure determine recruitment of intertidal mussels and barnacles in the southern Benguela upwelling regions. *Marine Ecology Progress Series* 425: 141–152.
- Plass-Johnson JG, McQuaid CD, Porri F. 2010. Top-down effects on intertidal mussel populations: assessing two predator guilds in a South African marine protected area. *Marine Ecology Progress Series* 411: 149–159.
- Porri F, Jordaan T, McQuaid CD. 2008. Does cannibalism of larvae by adults affect settlement and connectivity of mussel populations? *Estuarine, Coastal and Shelf Science* 79: 687–693.
- Porri F, Zardi GI, McQuaid CD, Radloff S. 2007. Tidal height, rather than habitat selection for conspecifics, controls settlement in mussels. *Marine Biology* 152: 631–637.
- Reaugh-Flower K, Branch GM, Harris JM, McQuaid CD, Currie B, Dye A, Robertson B. 2011. Scale-dependent patterns and processes of intertidal mussel recruitment around southern Africa. *Marine Ecology Progress Series* 434: 101–119.
- Rius M, Clusella-Trullas S, McQuaid CD, Navarro RA, Griffiths CL, Matthee CA, von der Heyden S, Turon X. 2014. Range expansions across ecoregions: interactions of climate change, physiology and genetic diversity. *Global Ecology and Biogeography* 23: 76–88.
- Rius M, Heasman KG, McQuaid CD. 2011. Long-term coexistence of non-indigenous species in aquaculture facilities. *Marine Pollution Bulletin* 62: 2395–2403.
- Rius M, McQuaid CD. 2006. Wave action and competitive interaction between the invasive mussel *Mytilus galloprovincialis* and the indigenous *Perna perna* in South Africa. *Marine Biology* 150: 69–78.
- Rius M, McQuaid CD. 2009. Facilitation and competition between invasive and indigenous mussels over a gradient of physical stress. *Basic and Applied Ecology* 10: 607–613.
- Robinson TB, Branch GM, Griffiths CL, Govender A. 2007. Effects of experimental harvesting on recruitment of an alien mussel *Mytilus galloprovincialis*. *Journal of Experimental Marine Biology and Ecology* 345: 1–11.
- Robinson TB, Branch GM, Griffiths CL, Govender A. 2008. Resilience and elasticity of intertidal communities in response to harvesting of the alien mussel *Mytilus galloprovincialis*. *Journal of Experimental Marine Biology and Ecology* 354: 169–181.
- Robinson TB, Branch GM, Griffiths CL, Govender A, Hockey PAR. 2007. Changes in South African rocky intertidal invertebrate community structure associated with the invasion of the mussel *Mytilus galloprovincialis*. *Marine Ecology Progress Series* 340: 163–171.
- Robinson TB, Govender A, Griffiths CL, Branch GM. 2007. Experimental harvesting of *Mytilus galloprovincialis*: Can an alien mussel support a small-scale fishery? *Fisheries Research* 88: 33–41.
- Robinson TB, Griffiths CL, Branch GM, Govender A. 2007. The invasion and subsequent die-off of *Mytilus galloprovincialis* in Langebaan Lagoon, South Africa: effects on natural communities. *Marine Biology* 152: 225–232.
- Robinson TB, Griffiths CL, Kruger N. 2004. Distribution and status of marine invasive species in and bordering the West Coast National Park. *Koedoe* 47: 79–87.
- Robinson TB, Griffiths CL, McQuaid CD, Rius M. 2005. Marine alien species of South Africa - status and impacts. *African Journal of Marine Science* 27: 297–306.
- Robinson TB, Griffiths CL, Tonin A, Bloomer P, Hare MP. 2005. Naturalised populations of oysters *Crassostrea gigas* along the South African coast: distribution, abundance and population structure. *Journal of Shellfish Research* 24: 443–450.

- Simon-Blecher N, Granevitze Z, Achituv Y. 2008. *Balanus glandula*: from North-West America to the west coast of South Africa. *African Journal of Marine Science* 30: 85–92.
- Steffani CN, Branch GM. 2003. Growth rate, condition, and shell shape of *Mytilus galloprovincialis*: responses to wave exposure. *Marine Ecology Progress Series* 246: 197–209.
- Steffani CN, Branch GM. 2005. Mechanisms and consequences of competition between an alien mussel, *Mytilus galloprovincialis*, and an indigenous limpet, *Scutellastra argenvillei*. *Journal of Experimental Marine Biology and Ecology* 317: 127–142.
- Steffani CN, Branch GM. 2003. Spatial comparisons of populations of an indigenous limpet *Scutellastra argenvillei* and an alien mussel *Mytilus galloprovincialis* along a gradient of wave energy. *African Journal of Marine Science* 25: 195–212.
- von der Meden CEO, Porri F, Erlandsson J, McQuaid CD. 2008. Coastline topography affects the distribution of indigenous and invasive mussels. *Marine Ecology Progress Series* 372: 135–145.
- von der Meden CEO, Porri F, McQuaid CD, Faulkner K, Robey J. 2010. Fine-scale ontogenetic shifts in settlement behaviour of mussels: changing responses to biofilm and conspecific settler presence in *Mytilus galloprovincialis* and *Perna perna*. *Marine Ecology Progress Series* 411: 161–171.
- Xavier BM, Branch GM, Wieters E. 2007. Abundance, growth and recruitment of *Mytilus galloprovincialis* on the west coast of South Africa in relation to upwelling. *Marine Ecology Progress Series* 346: 189–201.
- Zardi GI, McQuaid CD, Nicastro KR. 2007. Balancing survival and reproduction: seasonality of wave action, attachment strength and reproductive output in indigenous *Perna perna* and the invasive *Mytilus galloprovincialis* mussels. *Marine Ecology Progress Series* 334: 155–163.
- Zardi GI, McQuaid CD, Teske PR, Barker NP. 2007. Unexpected genetic structure of mussel populations in South Africa; indigenous *Perna perna* and invasive *Mytilus galloprovincialis*. *Marine Ecology Progress Series* 337: 135–144.
- Zardi GI, Nicastro KR, McQuaid CD, Erlandsson J. 2008. Sand and wave induced mortality in invasive (*Mytilus galloprovincialis*) and indigenous (*Perna perna*) mussels. *Marine Biology* 153: 853–858.
- Zardi GI, Nicastro KR, McQuaid CD, Gektidis M. 2009. Effects of endolithic parasitism on invasive and indigenous mussels in a variable physical environment. *PLoS ONE* 4: e6560.
- Zardi GI, Nicastro KR, McQuaid CD, Rius M, Porri M. 2006. Hydrodynamic stress and habitat partitioning between indigenous (*Perna perna*) and invasive (*Mytilus galloprovincialis*) mussels: constraints of an evolutionary strategy. *Marine Biology* 150: 79–88.
- Zardi GI, Nicastro KR, Porri F, McQuaid CD. 2006. Sand stress as a non-determinant of habitat segregation of indigenous (*Perna perna*) and invasive (*Mytilus galloprovincialis*) mussels in South Africa. *Marine Biology* 148: 1031–1038.
